# Supplementary material
Source: PubMed Central journal article supplement (PMC4333607)

# Supporting Information for “Ultrasound Enhanced Attenuated Total Reflection Mid-Infrared Spectroscopy In-line Probe – Acquisition of Cell Spectra in a Bioreactor”

Cosima Koch,<sup>†</sup> Markus Brandstetter,<sup>†,§</sup> Patrick Wechselberger,<sup>‡,⊥</sup> Bettina Lorantfy,<sup>‡,||</sup> Maria Reyes Plata,<sup>†</sup> Stefan Radel,<sup>†</sup> Christoph Herwig,<sup>‡,⊥</sup> Bernhard Lendl<sup>\*,†</sup>

<sup>†</sup>Institute of Chemical Technologies and Analytics, Vienna University of Technology, Getreidemarkt 9/164-UPA, 1060 Vienna, Austria

<sup>‡</sup>Institute of Chemical Engineering, Vienna University of Technology, Gumpendorferstraße 1a, 1060 Vienna, Austria

<sup>⊥</sup>Christian Doppler Laboratory for Mechanistic and Physiological Methods for Improved Bioprocesses, Institute of Chemical Engineering, Vienna University of Technology, Getreidemarkt 9/166, 1060 Vienna, Austria

\*corresponding author: [bernhard.lendl@tuwien.ac.at](mailto:bernhard.lendl@tuwien.ac.at)

---

## DESCRIPTION OF CONTENTS:

Experimental: Details on media preparation and cultivation conditions, page S2

Table S1: Overview of setups and conditions of the fed-batch fermentations, page S2

Figure S1: Spectra of *S. cerevisiae* acquired in-line during batch phase, page S3

---

## EXPERIMENTAL

All reagents for yeast media were supplied by Carl Roth GmbH (Karlsruhe, Germany).

Yeast peptone glucose (YEPG) medium for preculture: 40 g L<sup>-1</sup> glucose, 5 g L<sup>-1</sup> peptone and 5 g L<sup>-1</sup> yeast extract. The YEPG medium was autoclaved at 121°C for 20min. 200 mL of YEPG medium were inoculated with 1 mL of frozen stock of *S. cerevisiae* (strain: CBS 8340) under sterile conditions and subsequently incubated for 24 h at 30°C and 220 rpm in shake flasks.

Batch medium (6 L): 20 g L<sup>-1</sup> glucose, 5 g L<sup>-1</sup> ammonium sulphate, 3 g L<sup>-1</sup> potassium hydrogen phosphate, 0.5 g L<sup>-1</sup> magnesium sulfate heptahydrate. Additionally, 2.67 mL L<sup>-1</sup> of sterile vitamin and trace element solutions, respectively, as well as 0.1 mL L<sup>-1</sup> of sterile antifoam were added after autoclavation (121°C, 20 min).

Fed-batch feed medium (4 L): 100 g L<sup>-1</sup> glucose, 3 g L<sup>-1</sup> potassium hydrogen phosphate, 0.5 g L<sup>-1</sup> magnesium sulfate heptahydrate and 2.67 mL L<sup>-1</sup> of sterile vitamin and trace element solutions, respectively, as well as 0.1 mL L<sup>-1</sup> of sterile antifoam.

During batch fermentation, conditions were as follows: 6 L min<sup>-1</sup> (1 vvm) of airflow, 800 rpm speed of agitation, temperature 30°C and the pH was automatically adjusted to 4.8 by addition of 2 M NaOH. The batch process was started by inoculation with 600 mL of preculture (10% of batch volume). The fed-batch phase was run under the same conditions as the batch phase except that the airflow was increased with culture volume to remain at 1 vvm. An overview of the employed conditions and used set-ups can be found below (Table S1:). A lower growth rate (i.e. feed rate) was set for fermentation D to increase temporal resolution and allow for a tighter time grid of off-line samples.

**Table S1: Overview of setups and conditions of the four fed-batch fermentations.**

| ID | Fermenter | Stirring rate (rpm)  | Set growth rate $\mu$ (h <sup>-1</sup> ) |
|----|-----------|----------------------|------------------------------------------|
| A  | Chemap    | 600, 800, 1000, 1200 | 0.2                                      |
| B  | Chemap    | 800                  | 0.2                                      |
| C  | Chemap    | 800                  | 0.2                                      |
| D  | Techfors  | 800                  | 0.15                                     |

**FIGURE S1:**

Inline spectra of yeast acquired during the batch phase of the fermentation.

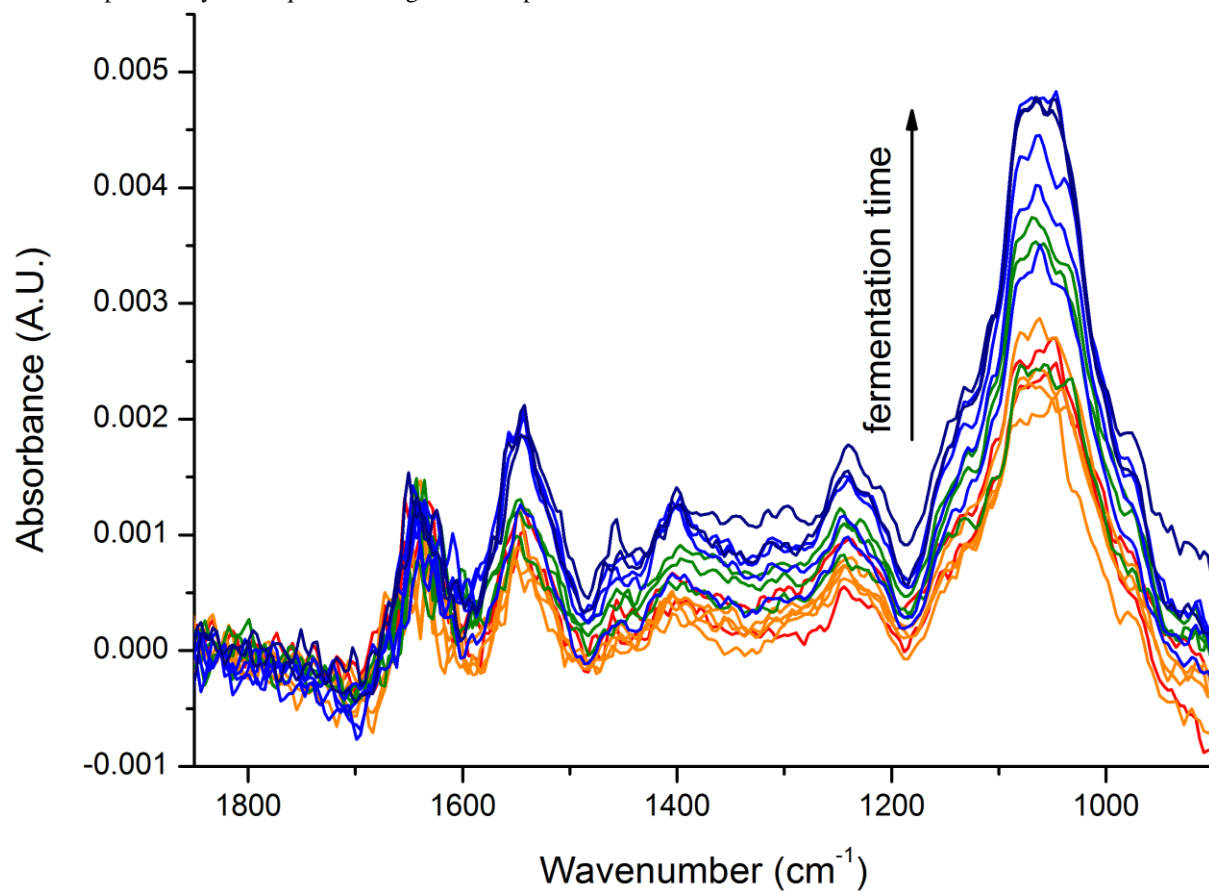

Supplement: ac504126v_si_001.pdf [file ac504126v_si_001.pdf]
